# Supplementary material for: A QM/MM Derived Polarizable Water Model for Molecular Simulation
Source: PubMed Central journal article supplement (PMC6321318; doi:10.3390/molecules23123131), 2018-11-29
Supplement: molecules-23-03131-s001.pdf [file molecules-23-03131-s001.pdf]

## Supplementary Material

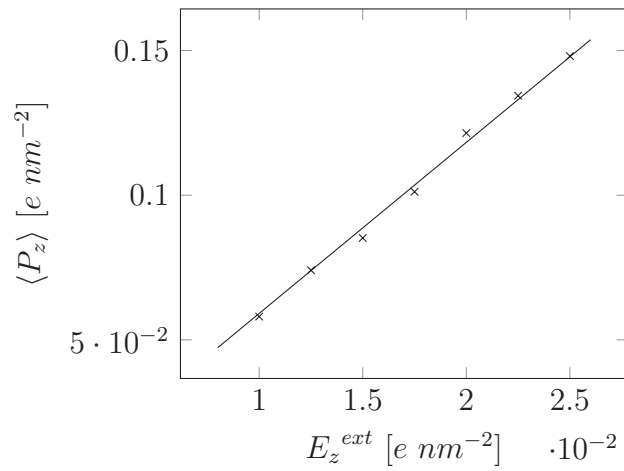

Figure S1: Averaged polarization response of our polarizable water model ( $\langle P_z \rangle$ ) to an external electric field ( $E_z^{ext}$ ), used to determine the model's static dielectric permittivity by linear regression ( $R^2 > 0.99$ ).
